# Supplementary material for: Sex-Dependent Effects of the Intake of NOVA Classified Ultra-Processed Foods on Syndrome Metabolic Components in Brazilian Adults
Source: MDPI journal article supplement (doi:10.3390/nu14153126), 2022-07-29
Supplement: s1 [file s1]

**Board S1.** List of food items of Food Frequency Questionnaire (FFQ) applied to participants of 1978/79 Ribeirão Preto cohort in the follow-up at 23-25 years. Ribeirão Preto, São Paulo, Brazil.

|                                                            |
|------------------------------------------------------------|
| Whole milk                                                 |
| Skimmed milk                                               |
| Semi-skimmed milk                                          |
| Whole natural yogurt                                       |
| Skimmed natural yogurt                                     |
| Yogurt with fruits flavor                                  |
| White cheese or ricotta                                    |
| Yellow cheeses                                             |
| Cream curd cheese                                          |
| French bread, loaf bread                                   |
| Wholemeal bread, rye bread                                 |
| Sweet bread, cheese bread others                           |
| Sweet/savory biscuits or toasts                            |
| Oatmeal, granola and others                                |
| Regular margarine                                          |
| Light margarine                                            |
| Butter                                                     |
| Mayonnaise                                                 |
| White rice                                                 |
| Potatoes, cassava and polenta (fries)                      |
| Potatoes, cassava and polenta (other types of preparation) |
| Green corn                                                 |
| Sweet potato                                               |
| Pasta (noodles, gnocchi)                                   |
| Savory and pie (pizza)                                     |
| Farofa <sup>a</sup> , corn flour                           |
| Orange, tangerine                                          |
| Banana                                                     |
| Apple, pear                                                |
| Papaya                                                     |
| Watermelon, melon                                          |
| Grape, pineapple, guava (in season)                        |
| Avocado (in season)                                        |
| Mango, persimmon (in season)                               |
| Other fruits                                               |
| Natural orange juice                                       |
| Juice from other fruits                                    |

|                                                        |
|--------------------------------------------------------|
| Purple beans, carioca beans                            |
| Peas, lentils, others                                  |
| Feijoadada <sup>b</sup>                                |
| Lettuce, endive, watercress, arugula, chicory          |
| Cabbage, chard, kale, spinach                          |
| Broccoli, Cauliflower                                  |
| Carrot, pumpkin                                        |
| Tomato                                                 |
| Eggplant                                               |
| Beetroot, pod, chayote, zucchini                       |
| Soups                                                  |
| Beef without fat                                       |
| Beef with fat                                          |
| Pork without fat                                       |
| Pork with fat                                          |
| Bacon, lard, crackling                                 |
| Chicken, chester, turkey, other poultry (without skin) |
| Chicken, chester, turkey, other poultry (with skin)    |
| Fishes                                                 |
| Offals of ox, poultry or pork, tripe                   |
| Shrimp, seafood                                        |
| Pepperoni sausage, franks                              |
| Ham, bologna, others                                   |
| Boiled egg                                             |
| Fried egg                                              |
| Brewed coffee without sugar/without sweetener          |
| Brewed coffee with sugar                               |
| Brewed coffee with sweetener                           |
| Black or matt tea                                      |
| Herbs tea                                              |
| Water                                                  |
| Beer                                                   |
| Sugar cane brandy, distilled drinks                    |
| Wine                                                   |
| Artificial juices                                      |
| Diet/light soft drink                                  |
| Regular soft drink                                     |
| Phosphated soft drink                                  |
| Sweet cakes and pies                                   |
| Chocolate, Brazilian sweet truffle                     |
| Honey, jam                                             |

---

|                           |
|---------------------------|
| Ice cream, milkshake      |
| Pudding, sweets with milk |
| Sweets of fruits          |
| Nuts and oilseeds         |
| Popcorn, chips, others    |

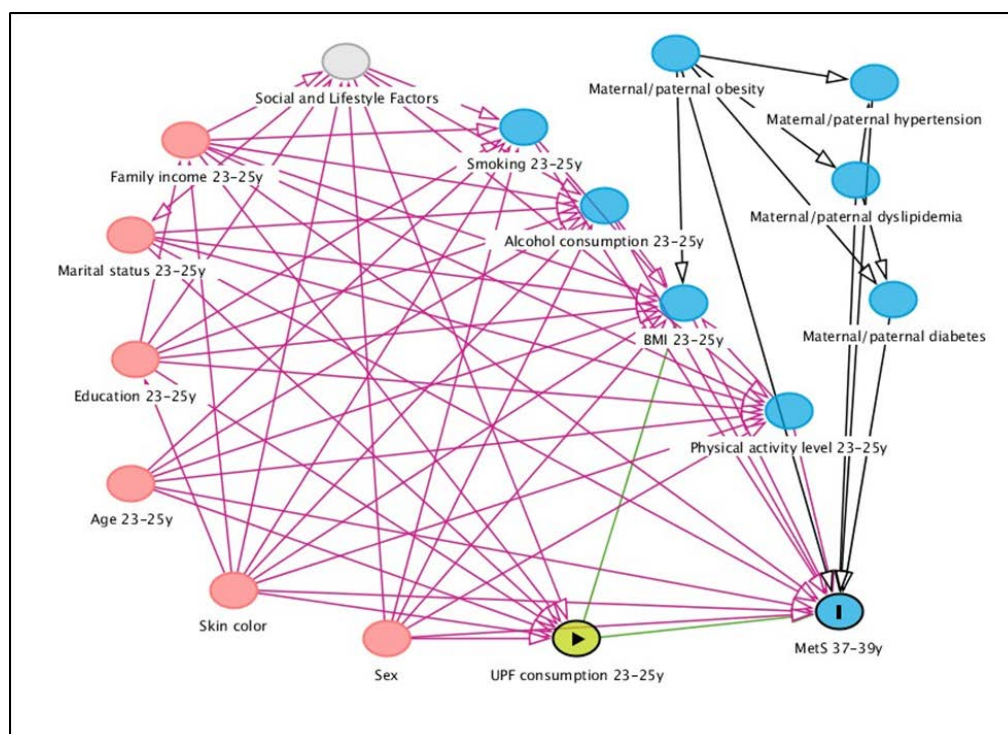

**Figure S1.** Directed Acyclic Graph (DAG) of the longitudinal association between ultraprocessed foods (UPF) consumption and metabolic syndrome (MetS).

**Table S1.** Total ultraprocessed foods (UPF) consumption and its subgroups at 23-25 years according to sex in the sample excluding those who already had waist circumference increased (N = 680). Ribeirão Preto Cohort 1978/79, São Paulo, Brazil.

| UPF                                        | %kcal       |             |                    | %g          |             |                      |
|--------------------------------------------|-------------|-------------|--------------------|-------------|-------------|----------------------|
|                                            | Male        | Female      | P-value            | Male        | Female      | P-value <sup>a</sup> |
|                                            | Mean (SD)   | Mean (SD)   |                    | Mean (SD)   | Mean (SD)   |                      |
| <b>UPF total</b>                           | 36.2 (10.9) | 40.0 (11.2) | <b>&lt; 0.0001</b> | 35.3 (14.2) | 36.0 (15.5) | 0.5186               |
| <b>Dairy products <sup>b</sup></b>         | 1.2 (1.6)   | 2.1 (2.5)   | <b>&lt; 0.0001</b> | 1.0 (1.4)   | 1.9 (2.4)   | <b>&lt; 0.0001</b>   |
| <b>Ultra-processed breads <sup>c</sup></b> | 1.8 (1.6)   | 2.4 (2.2)   | <b>0.0001</b>      | 0.7 (0.7)   | 0.9 (0.8)   | <b>0.0019</b>        |
| <b>Biscuits <sup>d</sup></b>               | 2.6 (2.7)   | 3.6 (3.8)   | <b>0.0001</b>      | 0.6 (0.7)   | 0.9 (1.0)   | <b>0.0002</b>        |
| <b>Granola</b>                             | 0.4 (1.1)   | 0.8 (1.7)   | <b>0.0020</b>      | 0.1 (0.3)   | 0.2 (0.5)   | 0.0045               |
| <b>Instant noodles</b>                     | 1.0 (0.8)   | 1.1 (0.8)   | 0.1727             | 0.4 (0.4)   | 0.5 (0.4)   | 0.3290               |
| <b>Margarines <sup>e</sup></b>             | 0.8 (1.0)   | 0.9 (1.2)   | 0.2701             | 0.1 (0.2)   | 0.2 (0.2)   | 0.0976               |
| <b>Mayonnaise</b>                          | 0.5 (0.7)   | 0.4 (0.7)   | 0.1174             | 0.2 (0.2)   | 0.2 (0.3)   | 0.2155               |
| <b>Salty snacks <sup>f</sup></b>           | 9.2 (7.3)   | 7.3 (6.3)   | <b>0.0003</b>      | 4.1 (3.7)   | 3.1 (3.0)   | <b>0.0003</b>        |
| <b>Sausage meats <sup>g</sup></b>          | 1.9 (1.8)   | 1.6 (1.7)   | <b>0.0232</b>      | 1.2 (1.0)   | 1.0 (0.9)   | <b>0.0225</b>        |
| <b>Soft drinks and artificial juices</b>   | 9.7 (6.6)   | 10.3 (8.6)  | 0.2883             | 24.4 (13.6) | 24.2 (15.7) | 0.8447               |
| <b>Distilled beverages <sup>h</sup></b>    | 0.1 (0.4)   | 0.1 (0.3)   | <b>0.0364</b>      | 0.1 (0.2)   | 0.04 (0.1)  | <b>0.0304</b>        |
| <b>Sweet cakes and pies</b>                | 1.7 (2.1)   | 2.1 (2.7)   | <b>0.0104</b>      | 0.7 (0.9)   | 0.9 (1.3)   | <b>0.0248</b>        |
| <b>Sweets and desserts <sup>i</sup></b>    | 3.5 (3.5)   | 5.0 (4.2)   | <b>&lt; 0.0001</b> | 1.1 (1.2)   | 1.5 (1.3)   | <b>0.0002</b>        |
| <b>Chips</b>                               | 1.6 (2.8)   | 1.9 (2.7)   | 0.1270             | 0.4 (1.0)   | 0.4 (0.7)   | 0.3372               |

<sup>a</sup> Student's t-test.

<sup>b</sup> Yogurt sweetened or artificially flavored and industrialized cream curd cheese; <sup>c</sup> Industrialized breads: wholemeal bread, white bread and sweet bread; <sup>d</sup> Industrialized sweet and savory biscuits; <sup>e</sup> Regular and light margarine; <sup>f</sup> Pizza and savory pies; <sup>g</sup> Pepperoni sausage, franks, ham and bologna; <sup>h</sup> Sugar cane brandy, vodka and whiskey; <sup>i</sup> Chocolate, Brazilian sweet truffle, ice cream, milkshake, pudding, sweets with milk.

**Table S2.** Total ultraprocessed foods (UPF) consumption and its subgroups at 23–25 years according to sex in the sample excluding those who already had low HDL-cholesterol (N = 586). Ribeirão Preto Cohort 1978/79, São Paulo, Brazil.

| UPF                                        | %kcal       |             | P-value <sup>a</sup> |
|--------------------------------------------|-------------|-------------|----------------------|
|                                            | Male        | Female      |                      |
|                                            | Mean (SD)   | Mean (SD)   |                      |
| <b>UPF total</b>                           | 35.5 (10.5) | 39.9 (11.1) | <b>&lt; 0.0001</b>   |
| <b>Dairy products <sup>b</sup></b>         | 1.1 (1.4)   | 2.0 (2.3)   | <b>&lt; 0.0001</b>   |
| <b>Ultra-processed breads <sup>c</sup></b> | 1.9 (1.7)   | 2.5 (2.2)   | <b>0.0009</b>        |
| <b>Biscuits <sup>d</sup></b>               | 2.4 (2.6)   | 3.7 (4.0)   | <b>&lt; 0.0001</b>   |
| <b>Granola</b>                             | 0.5 (1.3)   | 0.7 (1.7)   | 0.1226               |
| <b>Instant noodles</b>                     | 1.0 (0.8)   | 1.1 (0.9)   | 0.0695               |
| <b>Margarines <sup>e</sup></b>             | 0.7 (0.9)   | 0.9 (1.1)   | <b>0.0285</b>        |
| <b>Mayonnaise</b>                          | 0.5 (0.7)   | 0.5 (0.8)   | 0.3143               |
| <b>Salty snacks <sup>f</sup></b>           | 9.1 (6.9)   | 7.2 (6.4)   | <b>0.0006</b>        |
| <b>Sausage meats <sup>g</sup></b>          | 2.0 (1.8)   | 1.6 (1.6)   | <b>0.0124</b>        |
| <b>Soft drinks and artificial juices</b>   | 9.4 (6.2)   | 10.1 (8.8)  | 0.2404               |
| <b>Distilled beverages <sup>h</sup></b>    | 0.2 (0.4)   | 0.1 (0.3)   | <b>0.0017</b>        |
| <b>Sweet cakes and pies</b>                | 1.5 (1.8)   | 2.2 (2.6)   | <b>0.0006</b>        |
| <b>Sweets and desserts <sup>i</sup></b>    | 3.8 (3.8)   | 5.3 (4.4)   | <b>&lt; 0.0001</b>   |
| <b>Chips</b>                               | 1.5 (2.7)   | 1.9 (2.8)   | 0.0512               |

<sup>a</sup> Student's t-test.

<sup>b</sup> Yogurt sweetened or artificially flavored and industrialized cream curd cheese; <sup>c</sup> Industrialized breads: wholemeal bread, white bread and sweet bread; <sup>d</sup> Industrialized sweet and savory biscuits; <sup>e</sup> Regular and light margarine; <sup>f</sup> Pizza and savory pies; <sup>g</sup> Pepperoni sausage, franks and ham; <sup>h</sup> Sugar cane brandy, vodka and whiskey; <sup>i</sup> Chocolate, ice cream, milkshake, pudding, sweets with milk.
